# Supplementary material for: Study on Antipyretic Properties of Phenolics in Lonicerae Japonicae Flos Based on Ultrahigh Performance Liquid Chromatography-Tandem Mass Spectrometry Combined with Network Pharmacology
Source: Hindawi journal article supplement (doi:10.1155/2023/8883860), 2023-12-08
Supplement: f1 [file 8883860.f1.doc]

Supplementary Documents

Supplementary Table 1. Information and HPLC-MS/MS parameters for MRM on phenolic acids and flavonoids in LJF.

| **No.** | **Components** | **Molecular formula** | **tR(min)** | **MS1** | **MS2** | **CV（V）** | **CE（eV）** | **Concentration**  **(ug/ml)** |
| --- | --- | --- | --- | --- | --- | --- | --- | --- |
| P1 | Chlorogenic acid | C16H18O9 | 9.050 | 353.0 | 191.0 | 121 | 13 | 4.10 |
| P2 | 3,5-*O*-dicaffeoylquinic acid | C25H24O12 | 22.351 | 515.0 | 353.0 | 120 | 13 | 6.95 |
| P3 | 4,5-*O*-dicaffeoylquinic acid | C25H24O12 | 25.609 | 515.0 | 353.0 | 119 | 15 | 5.50 |
| P4 | Protocatechuic acid | C7H6O4 | 3.464 | 153.0 | 109.0 | 111 | 15 | 7.75 |
| P5 | Caffeic acid methyl ester | C10H10O4 | 20.344 | 193.0 | 134.0 | 104 | 20 | 8.65 |
| P6 | Chlorogenic acid methyl ester | C17H20O9 | 15.8 | 367.0 | 135.0 | 141 | 35 | 5.75 |
| P7 | 5-O-caffeoylquinic acid | C16H18O9 | 5.066 | 353.0 | 191.0 | 121 | 15 | 5.30 |
| P8 | 4-*O*-caffeoylquinic acid | C16H18O9 | 10.091 | 353.0 | 191.0 | 157 | 14 | 3.70 |
| P9 | 3,4-*O*-dicaffeoylquinic acid | C25H24O12 | 20.543 | 515.0 | 353.0 | 164 | 21 | 5.95 |
| P10 | Caffeic acid | C9H8O4 | 9.101 | 179.0 | 135.0 | 114 | 15 | 3.25 |
| P11 | Ferulic acid | C10H10O4 | 14.582 | 193.0 | 134.0 | 98 | 11 | 8.40 |
| P12 | 3,5-*O*-dicaffeoylquinic acid methyl ester | C26H26O12 | 32.622 | 529.1 | 367.0 | 130 | 25 | 2.70 |
| F1 | Quercetin-3-*O*-rutinoside | C27H30O16 | 7.138 | 609.5 | 299.9 | 235 | 46 | 49.00 |
| F2 | Quercetin-3-*O*-galactoside | C21H20O12 | 7.255 | 463.0 | 299.8 | 175 | 38 | 6.90 |
| F3 | Isoquercitrin | C21H20O12 | 7.380 | 463.0 | 299.9 | 180 | 27 | 24.60 |
| F4 | Luteolin-7-*O*-glucoside | C21H20O11 | 7.508 | 447.0 | 284.9 | 193 | 35 | 23.70 |
| F5 | Luteolin-7-*O*-neohesperidoside | C27H30O15 | 7.569 | 593.5 | 285.0 | 270 | 53 | 42.70 |
| F6 | Kaempferol-3-*O*-rutinoside | C27H30O15 | 7.926 | 593.0 | 284.0 | 230 | 48 | 10.70 |
| F7 | Kaempferol-3-*O*-glucoside | C21H20O11 | 8.329 | 447.1 | 284.0 | 167 | 30 | 2.00 |
| F8 | Isorhamnetin-3-*O*-glucoside | C22H22O12 | 8.475 | 477.0 | 314.0 | 200 | 40 | 1.90 |
| F9 | Apigenin-7-*O*-glucoside | C21H20O10 | 8.582 | 433.0 | 271.1 | 120 | 40 | 7.20 |
| F10 | Luteolin | C23H24O12 | 8.808 | 491.1 | 312.9 | 203 | 45 | 2.70 |
| F11 | Quercetin | C15H10O6 | 11.294 | 285.2 | 133.0 | 180 | 36 | 19.90 |
| F12 | Diosmetin | C15H10O7 | 11.995 | 301.2 | 151.0 | 155 | 35 | 0.90 |
| F13 | Apigenin | C16H12O6 | 14.429 | 299.0 | 283.9 | 157 | 20 | 0.30 |
| F14 | Tricin-7-*O*-glucoside | C15H10O5 | 14.795 | 269.2 | 150.5 | 150 | 35 | 1.30 |
| F15 | Tricin | C17H14O7 | 15.478 | 329.0 | 298.9 | 140 | 30 | 0.90 |

Note: The ion detection mode of apigenin-7-*O*-glucoside was positive ion, and other components were negative ion detection mode.

**Supplementary Table 2. Phenolic acids and flavonoids in LJF.**

| **No.** | **Compounds** | **Formula** | **Class I** | **Class II** | **CAS** |
| --- | --- | --- | --- | --- | --- |
| LJF-01 | 4-nitrophenol | C6H5NO3 | Phenolic acids | Phenolic acids | 100-02-7 |
| LJF-02 | Diisobutyl phthalate | C16H22O4 | Phenolic acids | Phenolic acids | 84-69-5 |
| LJF-03 | Dibutyl phthalate | C16H22O4 | Phenolic acids | Phenolic acids | 84-74-2 |
| LJF-04 | Butyl isobutyl phthalate | C16H22O4 | Phenolic acids | Phenolic acids | 17851-53-5 |
| LJF-05 | Ferulic acid-4-*O*-glucoside | C16H20O9 | Phenolic acids | Phenolic acids | 117405-51-3 |
| LJF-06 | 1-*O*-salicyl-D-glucose | C13H16O8 | Phenolic acids | Phenolic acids | 60517-74-0 |
| LJF-07 | 3,4-dihydroxybenzoic acid (Protocatechuic acid) | C7H6O4 | Phenolic acids | Phenolic acids | 99-50-3 |
| LJF-08 | 3,5-*O*-dicaffeoylquinic acid methyl ester | C26H26O12 | Phenolic acids | Phenolic acids | 159934-13-1 |
| LJF-09 | Dimethyl phthalate | C10H10O4 | Phenolic acids | Phenolic acids | 131-11-3 |
| LJF-10 | 3,4-*O*-dicaffeoylquinic acid | C25H24O12 | Phenolic acids | Phenolic acids | 14534-61-3 |
| LJF-11 | Chlorogenic acid methyl ester | C17H20O9 | Phenolic acids | Phenolic acids | 29708-87-0 |
| LJF-12 | 3,5-*O*-dicaffeoylquinic acid | C25H24O12 | Phenolic acids | Phenolic acids | 2450-53-5 |
| LJF-13 | 2,5-dihydroxybenzoic acid; Gentisic acid | C7H6O4 | Phenolic acids | Phenolic acids | 490-79-9 |
| LJF-14 | Salicylic acid | C7H6O3 | Phenolic acids | Phenolic acids | 69-72-7 |
| LJF-15 | 1-*O*-caffeoyl-β-D-glucose | C15H18O9 | Phenolic acids | Phenolic acids | 14364-08-0 |
| LJF-16 | 1-*O*-gentisoyl-D-glucoside | C13H16O9 | Phenolic acids | Phenolic acids | 23445-11-6 |
| LJF-17 | 2,5-dihydroxybenzaldehyde | C7H6O3 | Phenolic acids | Phenolic acids | 1194-98-5 |
| LJF-18 | 3,4,5-tricaffeoylquinic acid | C34H30O15 | Phenolic acids | Phenolic acids | 86632-03-3 |
| LJF-19 | Vanillin | C8H8O3 | Phenolic acids | Phenolic acids | 121-33-5 |
| LJF-20 | Chlorogenic acid (3-O-Caffeoylquinic acid) | C16H18O9 | Phenolic acids | Phenolic acids | 327-97-9 |
| LJF-21 | Coniferin | C16H22O8 | Phenolic acids | Phenolic acids | 531-29-3 |
| LJF-22 | 4-Hydroxybenzoic acid | C7H6O3 | Phenolic acids | Phenolic acids | 99-96-7 |
| LJF-23 | Protocatechualdehyde | C7H6O3 | Phenolic acids | Phenolic acids | 139-85-5 |
| LJF-24 | Phthalic anhydride | C8H4O3 | Phenolic acids | Phenolic acids | 85-44-9 |
| LJF-25 | Neochlorogenic acid (5-*O*-caffeoylquinic acid) | C16H18O9 | Phenolic acids | Phenolic acids | 906-33-2 |
| LJF-26 | Terephthalic acid | C8H6O4 | Phenolic acids | Phenolic acids | 100-21-0 |
| LJF-27 | Cryptochlorogenic acid (4-*O*-caffeoylquinic acid) | C16H18O9 | Phenolic acids | Phenolic acids | 905-99-7 |
| LJF-28 | Ferulic acid | C10H10O4 | Phenolic acids | Phenolic acids | 537-98-4 |
| LJF-29 | 3-hydroxybenzaldehyde | C7H6O2 | Phenolic acids | Phenolic acids | 100-83-4 |
| LJF-30 | 4-hydroxybenzaldehyde | C7H6O2 | Phenolic acids | Phenolic acids | 123-08-0 |
| LJF-31 | Salicylic acid-2-O-glucoside | C13H16O8 | Phenolic acids | Phenolic acids | 10366-91-3 |
| LJF-32 | Cinnamic acid | C9H8O2 | Phenolic acids | Phenolic acids | 140-10-3 |
| LJF-33 | Robustaside B;[6'-*O*-caffeoylarbutin] | C21H22O10 | Phenolic acids | Phenolic acids | 136172-60-6 |
| LJF-34 | p-coumaric acid-4-*O*-glucoside | C15H18O8 | Phenolic acids | Phenolic acids | 117405-48-8 |
| LJF-35 | Caffeic acid | C9H8O4 | Phenolic acids | Phenolic acids | 331-39-5 |
| LJF-36 | 1,3-dicaffeoylquinic acid | C25H24O12 | Phenolic acids | Phenolic acids | 19870-46-3 |
| LJF-37 | 1-*O*-galloyl-D-glucose | C13H16O10 | Phenolic acids | Phenolic acids | 58511-73-2 |
| LJF-38 | 4,5-*O*-dicaffeoylquinic acid | C25H24O12 | Phenolic acids | Phenolic acids | 57378-72-0 |
| LJF-39 | Koaburaside | C14H20O9 | Phenolic acids | Phenolic acids | 41653-73-0 |
| LJF-40 | 1-caffeoylquinic acid | C16H18O9 | Phenolic acids | Phenolic acids | 1241-87-8 |
| LJF-41 | 3-O-p-coumaroylquinic acid | C16H18O8 | Phenolic acids | Phenolic acids | 87099-71-6 |
| LJF-42 | Sinapinaldehyde | C11H12O4 | Phenolic acids | Phenolic acids | 4206-58-0 |
| LJF-43 | Tyrosol | C8H10O2 | Phenolic acids | Phenolic acids | 501-94-0 |
| LJF-44 | 6-*O*-galloyl-D-glucose | C13H16O10 | Phenolic acids | Phenolic acids | 13186-19-1 |
| LJF-45 | Vanillic acid | C8H8O4 | Phenolic acids | Phenolic acids | 121-34-6 |
| LJF-46 | 2-hydroxycinnamic acid | C9H8O3 | Phenolic acids | Phenolic acids | 583-17-5 |
| LJF-47 | Syringic acid | C9H10O5 | Phenolic acids | Phenolic acids | 530-57-4 |
| LJF-48 | 2,6-di-tert-butylphenol | C14H22O | Phenolic acids | Phenolic acids | 128-39-2 |
| LJF-49 | 3,4-dihydroxybenzeneacetic acid | C8H8O4 | Phenolic acids | Phenolic acids | 102-32-9 |
| LJF-50 | Benzoic acid | C7H6O2 | Phenolic acids | Phenolic acids | 65-85-0 |
| LJF-51 | 2,4-di-tert-butylphenol | C14H22O | Phenolic acids | Phenolic acids | 96-76-4 |
| LJF-52 | Arbutin | C12H16O7 | Phenolic acids | Phenolic acids | 497-76-7 |
| LJF-53 | Ethyl caffeate | C11H12O4 | Phenolic acids | Phenolic acids | 102-37-4 |
| LJF-54 | 2,3-dihydroxybenzoic acid | C7H6O4 | Phenolic acids | Phenolic acids | 303-38-8 |
| LJF-55 | 4-*O*-p-coumaroylquinic acid | C16H18O8 | Phenolic acids | Phenolic acids | 32451-86-8 |
| LJF-56 | Phthalic acid | C8H6O4 | Phenolic acids | Phenolic acids | 88-99-3 |
| LJF-57 | 5-*O*-p-coumaroylquinic acid | C16H18O8 | Phenolic acids | Phenolic acids | 1899-30-5 |
| LJF-58 | Syringaldehyde; 4-hydroxy-3,5-dimethoxybenzaldehyde | C9H10O4 | Phenolic acids | Phenolic acids | 134-96-3 |
| LJF-59 | 2-hydroxy-3-phenylpropanoic acid | C9H10O3 | Phenolic acids | Phenolic acids | 7326-19-4 |
| LJF-60 | 3,4-dimethoxycinnamic acid | C11H12O4 | Phenolic acids | Phenolic acids | 14737-89-4 |
| LJF-61 | Benzamide | C7H7NO | Phenolic acids | Phenolic acids | 55-21-0 |
| LJF-62 | p-Coumaric acid | C9H8O3 | Phenolic acids | Phenolic acids | 501-98-4 |
| LJF-63 | 4-hydroxy-3-methoxymandelate | C9H10O5 | Phenolic acids | Phenolic acids | 55-10-7 |
| LJF-64 | 3,5-digalloylshikimic acid | C21H18O13 | Phenolic acids | Phenolic acids | 95753-52-9 |
| LJF-65 | Phenethyl caffeate | C17H16O4 | Phenolic acids | Phenolic acids | 104594-70-9 |
| LJF-66 | 2-Phenylethanol | C8H10O | Phenolic acids | Phenolic acids | 60-12-8 |
| LJF-67 | Rosmarinic acid-3'-*O*-glucoside | C24H26O13 | Phenolic acids | Phenolic acids | 910028-78-3 |
| LJF-68 | Coniferaldehyde | C10H10O3 | Phenolic acids | Phenolic acids | 20649-42-7 |
| LJF-69 | Ferulic acid methyl ester | C11H12O4 | Phenolic acids | Phenolic acids | 2309-07-1 |
| LJF-70 | 4-methoxycinnamaldehyde | C10H10O2 | Phenolic acids | Phenolic acids | 1963-36-6 |
| LJF-71 | Sinapaldehyde-4-*O*-glucoside | C17H22O9 | Phenolic acids | Phenolic acids | 154461-65-1 |
| LJF-72 | Methyl caffeate | C10H10O4 | Phenolic acids | Phenolic acids | 3843-74-1 |
| LJF-73 | 4-aminobenzoic acid | C7H7NO2 | Phenolic acids | Phenolic acids | 150-13-0 |
| LJF-74 | 4-methoxycinnamic acid | C10H10O3 | Phenolic acids | Phenolic acids | 830-09-1 |
| LJF-75 | p-coumaraldehyde | C9H8O2 | Phenolic acids | Phenolic acids | 2538-87-6 |
| LJF-76 | p-hydroxyphenyl acetic acid | C8H8O3 | Phenolic acids | Phenolic acids | 156-38-7 |
| LJF-77 | Hydrocinnamic acid | C9H10O2 | Phenolic acids | Phenolic acids | 501-52-0 |
| LJF-78 | Coniferyl alcohol | C10H12O3 | Phenolic acids | Phenolic acids | 458-35-5 |
| LJF-79 | Sinapoyl malate | C15H16O9 | Phenolic acids | Phenolic acids | 92344-58-6 |
| LJF-80 | 1,3-*O*-diferuloylglycerol | C23H24O9 | Phenolic acids | Phenolic acids | 83008-46-2 |
| LJF-81 | p-coumaric acid methyl ester | C10H10O3 | Phenolic acids | Phenolic acids | 3943-97-3 |
| LJF-82 | p-coumaryl alcohol | C9H10O2 | Phenolic acids | Phenolic acids | 3690-05-9 |
| LJF-83 | Isohyperoside | C21H20O12 | Flavonoids | Flavonols | 35589-21-0 |
| LJF-84 | Quercetin-7-*O*-rutinoside | C27H30O16 | Flavonoids | Flavonols | 147714-62-3 |
| LJF-85 | Isoquercitrin | C21H20O12 | Flavonoids | Flavonols | 21637-25-2 |
| LJF-86 | Kaempferol-7-*O*-glucoside | C21H20O11 | Flavonoids | Flavonols | 16290-07-6 |
| LJF-87 | Quercetin-3-*O*-neohesperidoside | C27H30O16 | Flavonoids | Flavonols | 117611-67-3 |
| LJF-88 | Quercetin-3-*O*-galactoside (Hyperin) | C21H20O12 | Flavonoids | Flavonols | 482-36-0 |
| LJF-89 | Cyanidin-3,5-*O*-diglucoside (Cyanin) | C27H31O16+ | Flavonoids | Anthocyanidins | 2611-67-8 |
| LJF-90 | Kaempferol-3-*O*-galactoside (Trifolin) | C21H20O11 | Flavonoids | Flavonols | 23627-87-4 |
| LJF-91 | Quercetin-3-*O*-glucoside (Isoquercitrin) | C21H20O12 | Flavonoids | Flavonols | 482-35-9 |
| LJF-92 | Hesperetin-5-*O*-glucoside | C22H24O11 | Flavonoids | Flavanones | 69651-80-5 |
| LJF-93 | Hispidulin-7-*O*-Glucoside | C22H22O11 | Flavonoids | Flavones | 17680-84-1 |
| LJF-94 | Diosmetin-7-*O*-glucoside | C22H22O11 | Flavonoids | Flavanones | 20126-59-4 |
| LJF-95 | Luteolin-3'-*O*-glucoside | C21H20O11 | Flavonoids | Flavones | 5154-41-6 |
| LJF-96 | Quercetin-4'-*O*-glucoside (Spiraeoside) | C21H20O12 | Flavonoids | Flavonols | 20229-56-5 |
| LJF-97 | Rhamnetin-3-*O*-glucoside | C22H22O12 | Flavonoids | Flavonols | 27875-34-9 |
| LJF-98 | Isorhamnetin-3-*O*-glucoside | C22H22O12 | Flavonoids | Flavonols | 5041-82-7 |
| LJF-99 | Quercetin-3-*O*-sambubioside | C26H28O16 | Flavonoids | Flavonols | 83048-35-5 |
| LJF-100 | Luteolin-4'-*O*-glucoside | C21H20O11 | Flavonoids | Flavones | 6920-38-3 |
| LJF-101 | Isorhamnetin-7-O-glucoside (Brassicin) | C22H22O12 | Flavonoids | Flavonols | 6743-96-0 |
| LJF-102 | Quercetin-7-*O*-glucoside | C21H20O12 | Flavonoids | Flavonols | 491-50-9 |
| LJF-103 | Quercetin-3-*O*-robinobioside | C27H30O16 | Flavonoids | Flavonols | 52525-35-6 |
| LJF-104 | Luteolin-7-*O*-rutinoside | C27H30O15 | Flavonoids | Flavones |  |
| LJF-105 | Quercetin-3-*O*-xyloside (Reynoutrin) | C20H18O11 | Flavonoids | Flavonols | 549-32-6 |
| LJF-106 | Dihydrokaempferol-3-*O*-glucoside | C21H22O11 | Flavonoids | Flavanonols | 31049-08-8 |
| LJF-107 | Prunetin (5,4'-Dihydroxy-7-methoxyisoflavone) | C16H12O5 | Flavonoids | Isoflavones | 552-59-0 |
| LJF-108 | Luteolin-7-*O*-neohesperidoside (Lonicerin) | C27H30O15 | Flavonoids | Flavones | 25694-72-8 |
| LJF-109 | Kaempferol-3-*O*-sambubioside | C26H28O15 | Flavonoids | Flavonols | 27661-51-4 |
| LJF-110 | Avicularin(Quercetin-3-*O*-α-L-arabinofuranoside) | C20H18O11 | Flavonoids | Flavonols | 572-30-5 |
| LJF-111 | Pratensein-7-*O*-glucoside | C22H22O11 | Flavonoids | Isoflavones | 36191-03-4 |
| LJF-112 | 6-hydroxy-5,7,4'-trimethoxyflavone | C18H16O6 | Flavonoids | Flavones | 6938-19-8 |
| LJF-113 | Apigenin-7-*O*-glucoside(Cosmosiin) | C21H20O10 | Flavonoids | Flavones | 578-74-5 |
| LJF-114 | Ikarisoside D | C28H30O11 | Flavonoids | Flavonols | / |
| LJF-115 | Peonidin-3,5-*O*-diglucoside | C28H33O16+ | Flavonoids | Anthocyanidins | 47851-83-2 |
| LJF-116 | Apigenin-7,4'-dimethyl ether | C17H14O5 | Flavonoids | Flavones | 5128-44-9 |
| LJF-117 | Kumatakenin | C17H14O6 | Flavonoids | Flavonols | 3301-49-3 |
| LJF-118 | 6-Methoxykaempferol-3-*O*-glucoside | C22H22O12 | Flavonoids | Flavonols | 63422-27-5 |
| LJF-119 | Kaempferol-3-*O*-rutinoside(Nicotiflorin) | C27H30O15 | Flavonoids | Flavonols | 17650-84-9 |
| LJF-120 | Apigenin-7-*O*-rutinoside (Isorhoifolin) | C27H30O14 | Flavonoids | Flavones | 552-57-8 |
| LJF-121 | Diosmetin (5,7,3'-Trihydroxy-4'-methoxyflavone) | C16H12O6 | Flavonoids | Flavanones | 520-34-3 |
| LJF-122 | Sophoricoside | C21H20O10 | Flavonoids | Isoflavones | 152-95-4 |
| LJF-123 | Chrysin-7-*O*-glucoside | C21H20O9 | Flavonoids | Flavones | 31025-53-3 |
| LJF-124 | Chrysin-5-*O*-glucoside (Toringin) | C21H20O9 | Flavonoids | Flavones | 1329-10-8 |
| LJF-125 | Hispidulin (5,7,4'-Trihydroxy-6-methoxyflavone) | C16H12O6 | Flavonoids | Flavones | 1447-88-7 |
| LJF-126 | Nepetin-7-*O*-glucoside | C22H22O12 | Flavonoids | Flavones | 569-90-4 |
| LJF-127 | Pratensein | C16H12O6 | Flavonoids | Isoflavones | 2284-31-3 |
| LJF-128 | Afzelechin (3,5,7,4'-Tetrahydroxyflavan) | C15H14O5 | Flavonoids | Flavanols | 2545-00-8 |
| LJF-129 | Rhamnocitrin (7-methylkaempferol) | C16H12O6 | Flavonoids | Flavonols | 569-92-6 |
| LJF-130 | Naringenin-7-*O*-glucoside (Prunin) | C21H22O10 | Flavonoids | Flavanones | 529-55-5 |
| LJF-131 | Daidzein-7-*O*-glucoside(Daidzin) | C21H20O9 | Flavonoids | Isoflavones | 552-66-9 |
| LJF-132 | Hesperetin-7-*O*-glucoside | C22H24O11 | Flavonoids | Flavanones | 31712-49-9 |
| LJF-133 | Acacetin | C16H12O5 | Flavonoids | Flavones | 480-44-4 |
| LJF-134 | Taxifolin-3'-*O*-glucoside | C21H22O12 | Flavonoids | Flavanonols | 31106-05-5 |
| LJF-135 | 2'-hydroxygenistein | C15H10O6 | Flavonoids | Isoflavones | 1156-78-1 |
| LJF-136 | Luteolin (5,7,3',4'-tetrahydroxyflavone) | C15H10O6 | Flavonoids | Flavones | 491-70-3 |
| LJF-137 | Kaempferol-3-O-glucoside (Astragalin) | C21H20O11 | Flavonoids | Flavonols | 480-10-4 |
| LJF-138 | Luteolin-7-*O*-glucoside (Cynaroside) | C21H20O11 | Flavonoids | Flavones | 5373-11-5 |
| LJF-139 | Madreselvin A | C28H32O17 | Flavonoids | Flavones | 188682-83-9 |
| LJF-140 | Quercetin-3-*O*-sophoroside (Baimaside) | C27H30O17 | Flavonoids | Flavonols | 18609-17-1 |
| LJF-141 | Galangin (3,5,7-trihydroxyflavone) | C15H10O5 | Flavonoids | Flavones | 548-83-4 |
| LJF-142 | 3,7-di-*O*-methylquercetin | C17H14O7 | Flavonoids | Flavonols | 2068-02-2 |
| LJF-143 | Apigenin-6,8-di-C-glucoside (Vicenin-2) | C27H30O15 | Flavonoids | Flavonoid carbonoside | 23666-13-9 |
| LJF-144 | Quercetin-3-*O*-rutinoside (Rutin) | C27H30O16 | Flavonoids | Flavonols | 153-18-4 |
| LJF-145 | Genkwanin (Apigenin 7-methyl ether) | C16H12O5 | Flavonoids | Flavones | 437-64-9 |
| LJF-146 | Quercetin-3-*O*-arabinoside (Guaijaverin) | C20H18O11 | Flavonoids | Flavonols | 22255-13-6 |
| LJF-147 | Quercetin-3,4'-*O*-di-glucoside | C27H30O17 | Flavonoids | Flavonols | 29125-80-2 |
| LJF-148 | Wogonin (5,7-Dihydroxy-8-Methoxyflavone) | C16H12O5 | Flavonoids | Flavones | 632-85-9 |
| LJF-149 | Isorhamnetin-3,7-*O*-diglucoside | C28H32O17 | Flavonoids | Flavonols | 6758-51-6 |
| LJF-150 | Phloretin-2'-*O*-glucoside (Phlorizin) | C21H24O10 | Flavonoids | Chalcones | 60-81-1 |
| LJF-151 | Jaceosidin-7-*O*-glucoside | C23H24O12 | Flavonoids | Flavones | 25474-11-7 |
| LJF-152 | Tricin-7-*O*-glucoside | C23H24O12 | Flavonoids | Flavones | 32769-01-0 |
| LJF-153 | Epicatechin | C15H14O6 | Flavonoids | Flavanols | / |
| LJF-154 | Azaleatin (5-*O*-Methylquercetin) | C16H12O7 | Flavonoids | Flavonols | 529-51-1 |
| LJF-155 | Quercetin-3-*O*-rhamnoside(Quercitrin) | C21H20O11 | Flavonoids | Flavonols | 522-12-3 |
| LJF-156 | Apigenin | C15H10O5 | Flavonoids | Flavones | 520-36-5 |
| LJF-157 | Vitexin-2''-*O*-glucoside | C27H30O15 | Flavonoids | Flavonoid carbonoside | 61360-94-9 |
| LJF-158 | Sieboldin | C21H24O11 | Flavonoids | Chalcones | 18777-73-6 |
| LJF-159 | Kaempferol-3-*O*-glucorhamnoside | C27H30O15 | Flavonoids | Flavonols | 40437-72-7 |
| LJF-160 | Quercetin | C15H10O7 | Flavonoids | Flavonols | 117-39-5 |
| LJF-161 | 5,4'-Dihydroxy-7-methoxyflavanone (Sakuranetin) | C16H14O5 | Flavonoids | Flavanones | 2957-21-3 |
| LJF-162 | Eriodictyol-8-C-glucoside | C21H22O11 | Flavonoids | Flavanones | 1023271-51-3 |
| LJF-163 | Kaempferol-3-*O*-neohesperidoside | C27H30O15 | Flavonoids | Flavonols | 32602-81-6 |
| LJF-164 | Tricin (5,7,4'-Trihydroxy-3',5'-dimethoxyflavone) | C17H14O7 | Flavonoids | Flavones | 520-32-1 |
| LJF-165 | Dihydrokaempferide | C16H14O6 | Flavonoids | Flavanonols | 137225-59-3 |
| LJF-166 | Apigenin-5-*O*-glucoside | C21H20O10 | Flavonoids | Flavones | 28757-27-9 |
| LJF-167 | Amentoflavone | C30H18O10 | Flavonoids | Biflavones | 1617-53-4 |
| LJF-168 | Syringetin-3-*O*-glucoside | C23H24O13 | Flavonoids | Flavonols | 40039-49-4 |
| LJF-169 | Chrysin | C15H10O4 | Flavonoids | Flavones | 480-40-0 |
| LJF-170 | Eriodictyol (5,7,3',4'-tetrahydroxyflavanone) | C15H12O6 | Flavonoids | Flavanones | 552-58-9 |
| LJF-171 | Apigenin-8-C-glucoside (Vitexin) | C21H20O10 | Flavonoids | Flavonoid carbonoside | 3681-93-4 |
| LJF-172 | 4',5,7-Trihydroxy-3',6-dimethoxyflavone (Jaceosidin) | C17H14O7 | Flavonoids | Flavones | 18085-97-7 |
| LJF-173 | Tricin-7-*O*-neohesperidoside | C29H34O16 | Flavonoids | Flavones | 53766-40-8 |
| LJF-174 | Laricitrin-3-*O*-glucoside | C22H22O13 | Flavonoids | Flavonols | 39986-90-8 |
| LJF-175 | Butin | C15H12O5 | Flavonoids | Flavanones | 492-14-8 |
| LJF-176 | Apigenin-6-C-glucoside (Isovitexin) | C21H20O10 | Flavonoids | Flavonoid carbonoside | 29702-25-8 |
| LJF-177 | Catechin | C15H14O6 | Flavonoids | Flavanols | 154-23-4 |
| LJF-178 | Hesperetin-7-*O*-neohesperidoside(Neohesperidin) | C28H34O15 | Flavonoids | Flavanones | 13241-33-3 |
| LJF-179 | 3'-methoxydaidzin | C22H22O10 | Flavonoids | Isoflavones | 200127-80-6 |
| LJF-180 | Naringenin chalcone | C15H12O5 | Flavonoids | Chalcones | 73692-50-9 |
| LJF-181 | 6''-*O*-Malonylgenistin | C24H22O13 | Flavonoids | Isoflavones | 51011-05-3 |
| LJF-182 | Genistein-8-C-glucoside | C21H20O10 | Flavonoids | Isoflavones | 66026-80-0 |
| LJF-183 | Naringenin (5,7,4'-trihydroxyflavanone) | C15H12O5 | Flavonoids | Flavanones | 480-41-1 |
| LJF-184 | Pinobanksin | C15H12O5 | Flavonoids | Flavanonols | 548-82-3 |
| LJF-185 | Aromadendrin-7-*O*-glucoside | C21H22O11 | Flavonoids | Flavanonols | 28189-90-4 |
| LJF-186 | Pinocembrin-7-*O*-glucoside (Pinocembroside) | C21H22O9 | Flavonoids | Flavanones | 75829-43-5 |
| LJF-187 | Diosmetin-7-*O*-rutinoside (Diosmin) | C28H32O15 | Flavonoids | Flavanones | 520-27-4 |
| LJF-188 | Tamarixetin-3-*O*-glucoside (Tamarixin) | C22H22O12 | Flavonoids | Flavonols | 27542-39-8 |
| LJF-189 | Diosmetin-7-*O*-neohesperidoside (Neodiosmin) | C28H32O15 | Flavonoids | Flavanones | 38665-01-9 |
| LJF-190 | Epigallocatechin-3-gallate | C22H18O11 | Flavonoids | Flavanols | 989-51-5 |
| LJF-191 | Epicatechin gallate | C22H18O10 | Flavonoids | Flavanols | 1257-08-5 |
| LJF-192 | Isorhamnetin-3-*O*-neohesperidoside | C28H32O16 | Flavonoids | Flavonols | 55033-90-4 |
| LJF-193 | Gallocatechin 3-*O*-gallate | C22H18O11 | Flavonoids | Flavanols | 5127-64-0 |
| LJF-194 | Luteolin-8-C-glucoside (Orientin) | C21H20O11 | Flavonoids | Flavonoid carbonoside | 28608-75-5 |

Supplementary Table 3. The contents of phenolic acids and flavonoids in LJF at different developmental stages.

| **No.** | **S-01** | **S-02** | **S-03** | **S-04** | **S-05** | **S-06** |
| --- | --- | --- | --- | --- | --- | --- |
| P1 | 41632.5609±  108.1100c | 45932.3087±  402.4829b | 48120.4935±  304.5193e | 47593.372±  239.8903a | 40243.9213±  78.4614d | 37555.2712±  240.7172f |
| P2 | 21033.8016±  290.1633b | 19136.7095±  451.6609c | 24190.7843±  477.0572a | 19421.1243±  65.7524c | 18137.2609±  294.9689d | 16883.1495±  387.2079e |
| P3 | 1576.9537±  31.0007a | 1479.2323±  32.5834b | 1542.8838±  1.1750a | 1503.7151±  20.8631a | 934.0133±  8.1090d | 1134.9062±  27.9582c |
| P4 | 2.9312±  0.0071c | 2.7660±  0.0148e | 2.8672±  0.0156d | 2.6665±  0.0361f | 3.1670±  0.0130b | 3.5910±  0.0513a |
| P5 | 0.2405±  0.0033e | 0.5590±  0.0032a | 0.1615±  0.0021f | 0.5145±  0.0027b | 0.4024±  0.0023c | 0.4003±  0.0030d |
| P7 | 1.7057±  0.0253c | 1.7539±  0.0019bc | 1.4404±  0.0174e | 1.9757±  0.0242a | 1.6296±  0.0106d | 1.7830±  0.0194b |
| P8 | 89.3036±  0.1043d | 100.1281±  0.2285b | 95.9740±  0.01330c | 104.5991±  3.1897a | 83.2897±  0.0956e | 94.1072±  0.2668c |
| P9 | 66.2734±  0.0857e | 71.6715±  0.1325d | 51.4290±  0.0390f | 93.8369±  0.4613b | 86.1105±  0.6230c | 105.7702±  1.9206a |
| P12 | 1334.6931±  21.7216a | 1056.1254±  14.1239b | 821.3425±  5.0197c | 767.5365±  5.2513d | 767.5365±  0.0648d | 586.9367±  6.6840e |
| P13 | 9.3605±  0.0348d | 9.6282±  0.0093c | 8.1264±  0.0135e | 11.3932±  0.1479a | 10.4474±  0.0962b | 9.5091±  0.0057cd |
| P15 | 2.7592±  0.0332e | 3.0986±  0.0027b | 3.3178±  0.0004a | 2.9996±  0.0414d | 3.0377±  0.0015c | 2.9493±  0.0058d |
| P16 | 1.9927±  0.0336b | 1.5845±  0.0001c | 2.0817±  0.0192a | 1.4910±  0.0350d | 1.5634±  0.0031c | 1.4920±  0.0274d |
| F1 | 833.1870±  9.0493e | 869.8450±  5.0842e | 1 498.8703±  25.7598a | 1 214.7199±  22.5515b | 1 147.7846±  17.3529c | 1 029.4658±  16.4682d |
| F2 | 32.6179±  0.9710b | 30.2569±  0.6503c | 40.9866±  0.2683a | 33.3345±  0.2142b | 25.6987±  0.0636d | 16.7226±  0.0983e |
| F3 | 379.7470±  1.11094d | 435.3424±  0.9491c | 611.6189±  7.1998a | 538.1429±  8.4019b | 436.0399±  1.5471c | 307.3184±  0.5390e |
| F4 | 420.6459±  1.6191f | 467.0942±  6.2257e | 837.1213±  9.4743b | 885.4190±  18.4099a | 768.3217±  25.8112c | 534.7958±  2.8653d |
| F5 | 243.7498±  6.2127e | 215.1018±  3.0332f | 472.7145±  6.4772a | 401.5385±  5.0680b | 330.3630±  1.5812c | 289.5712±  6.4511d |
| F6 | 49.3666±  1.5822f | 70.0916±  0.4991e | 142.5091±  0.7785b | 152.5883±  0.2728a | 126.7505±  0.2128c | 103.6546±  3.2450d |
| F7 | 0.9779±  0.0222f | 1.5848±  0.0067e | 3.2585±  0.0491c | 4.1056±  0.0278a | 3.4559±  0.0237b | 2.4200±  0.0825d |
| F8 | 27.1959±  0.2272c | 24.3860±  0.1357d | 39.0731±  0.1405a | 30.8349±  0.2927b | 20.1509±  0.2983e | 19.5811±  0.1959f |
| F9 | 12.1135±  0.0513e | 16.9538±  0.0432d | 62.4190±  0.6396c | 83.1242±  2.1669a | 80.8132±  1.2387a | 65.4034±  0.8973b |
| F10 | 5.3010±  0.0272a | 5.0503±  0.0794b | 4.9173±  0.0267c | 3.2840±  0.0247d | 1.9511±  0.0045e | 1.9473±  0.0089e |
| F11 | 96.4707±  1.1588a | 65.2425±  1.3349c | 76.3961±  1.3252b | 49.3393±  0.6858d | 36.1283±  0.5129e | 28.5778±  0.1367f |
| F12 | 7.0785±0.0725c | 7.7952±0.0290b | 8.3648±  0.0840a | 6.4480±  0.0200d | 5.9305±  0.0834e | 4.3925±  0.0682f |
| F13 | 0.3263±0.0084a | 0.1898±  0.082b | 0.1903±  0.0038b | 0.1379±  0.0049c | 0.0953±  0.0029d | 0.0895±  0.0019d |
| F14 | 2.1728±0.0898b | 1.5865±  0.686c | 2.4607±  0.0685a | 1.5226±  0.1806c | 2.0205±  0.0684b | 1.1769±  0.1183d |
| F15 | 2.9373±0.0166a | 1.7375±0.0063b | 1.1218±  0.0116c | 0.5172±  0.0087d | 0.2757±  0.0057e | 0.2044±  0.0059f |

Note: Different lowercase letters indicate significant difference between different segments (P < 0.05).


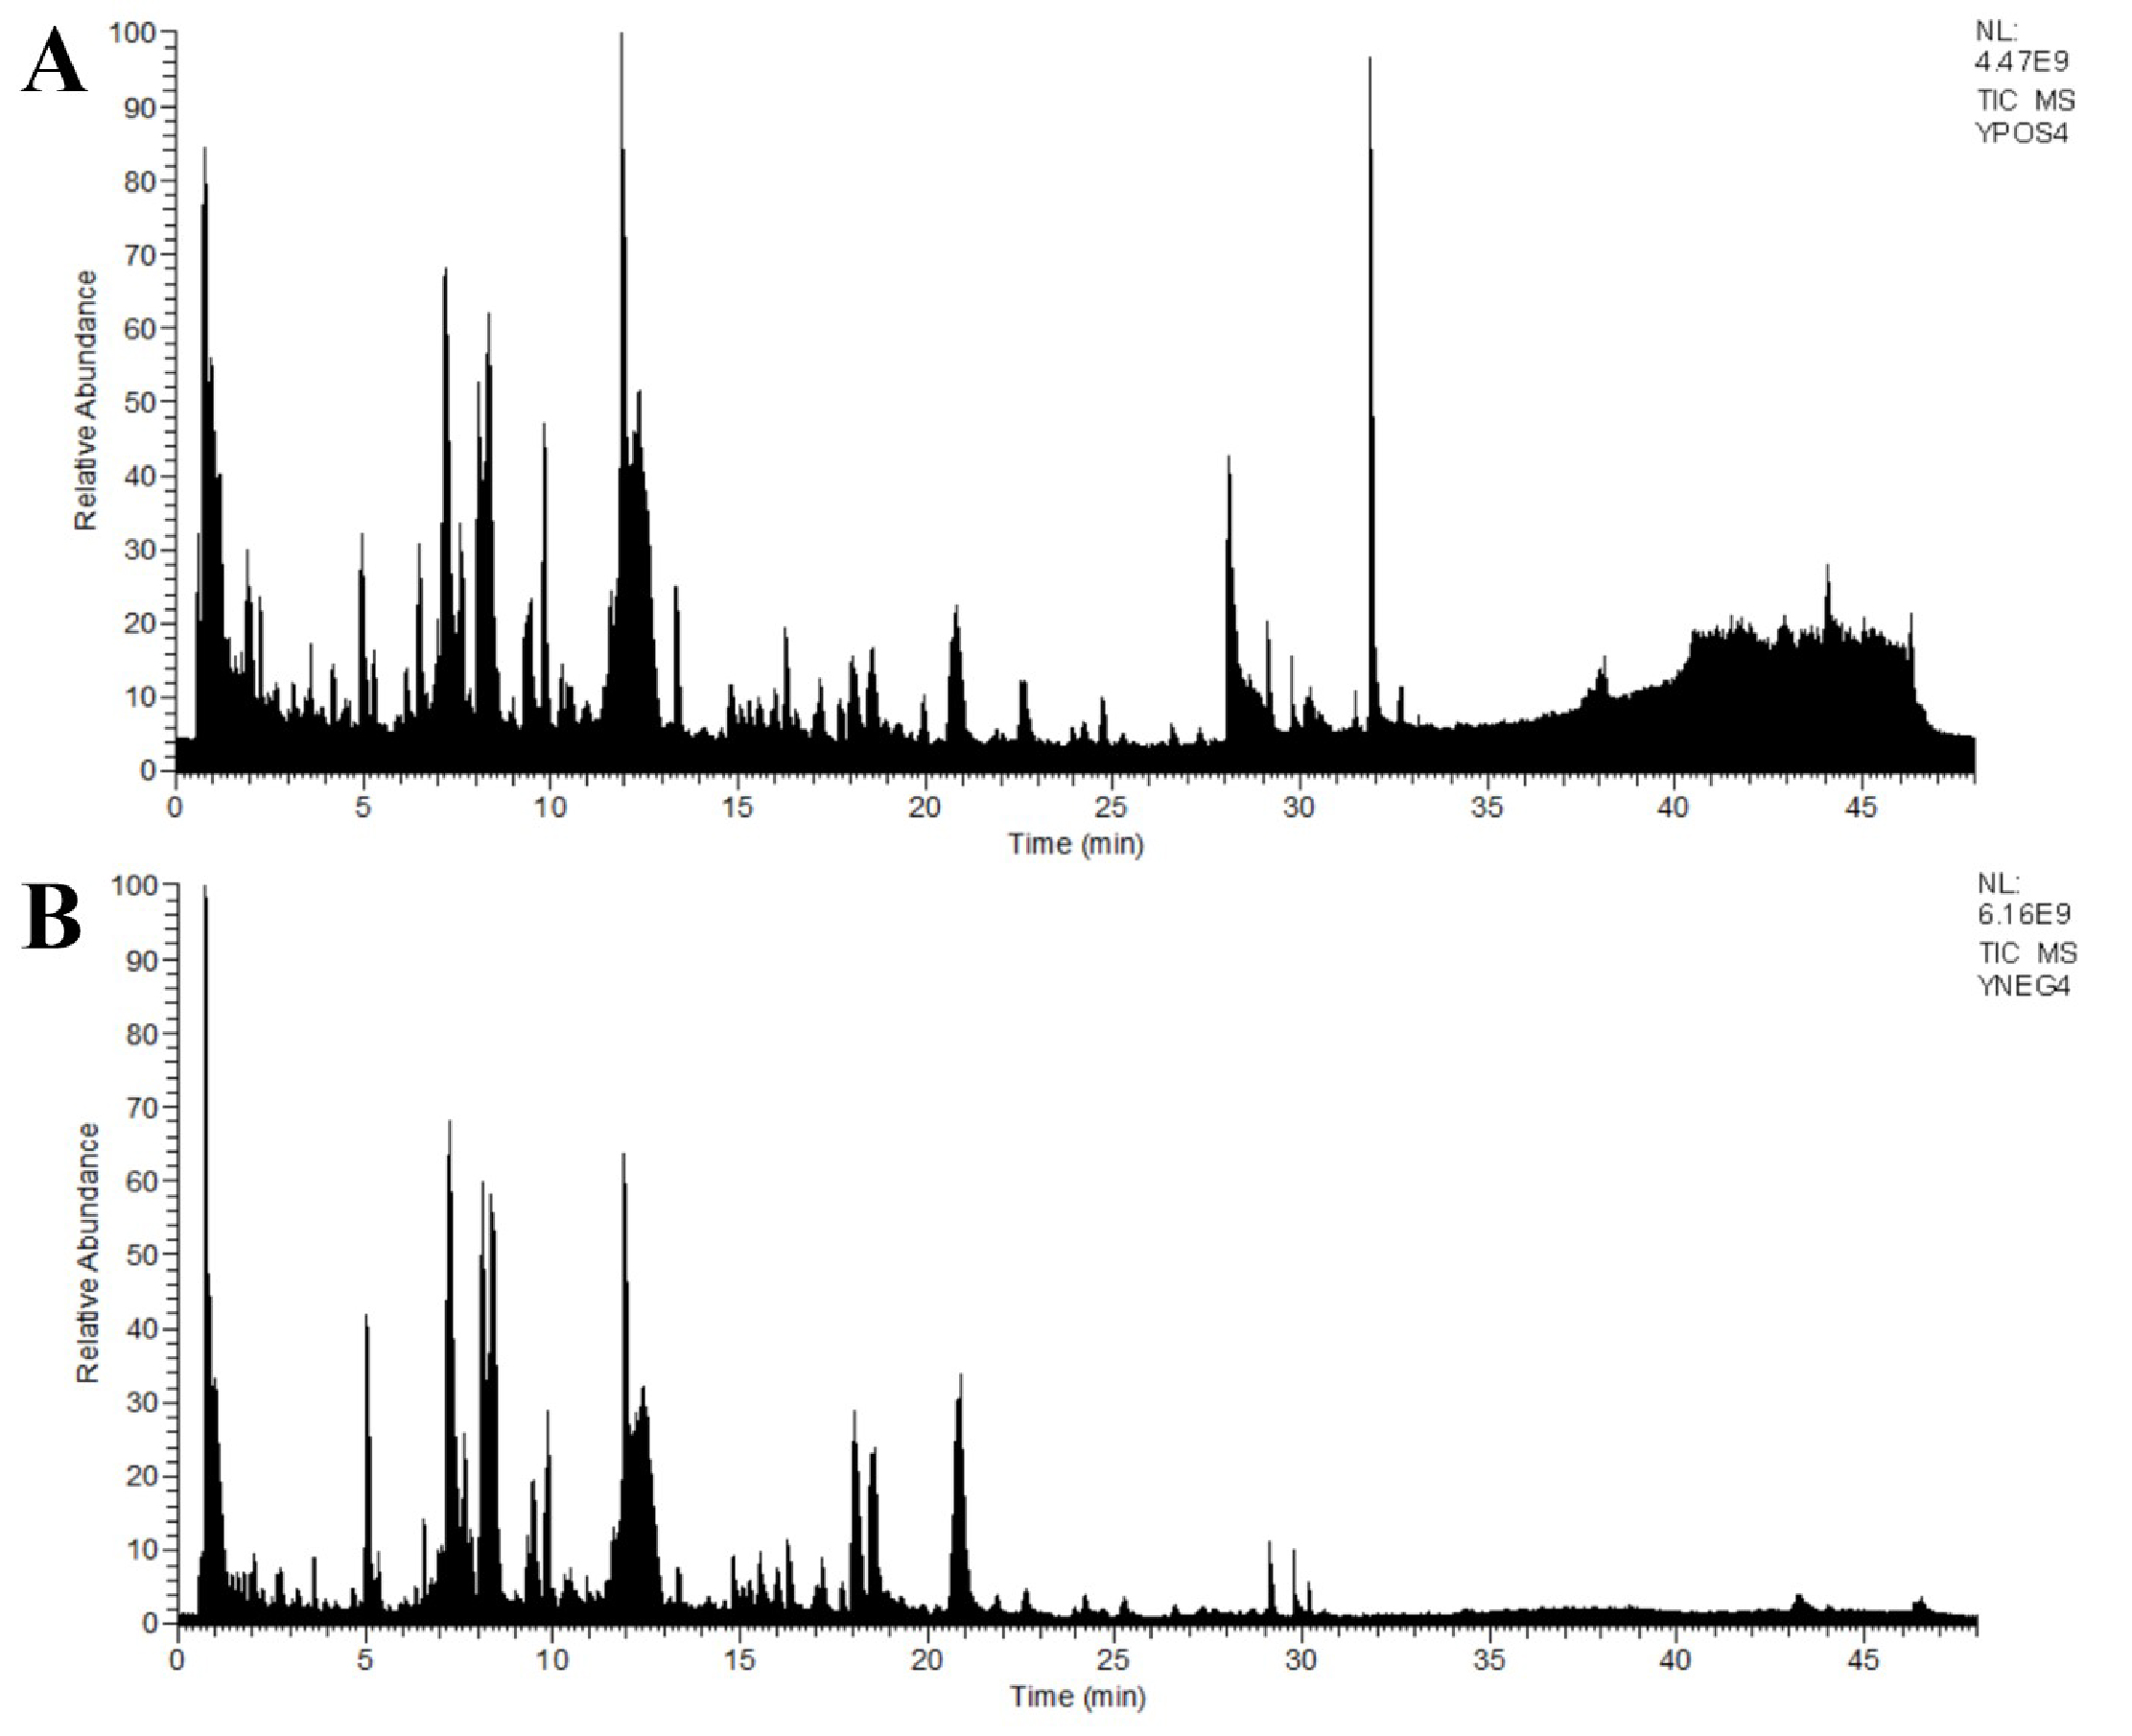


Note: A, positive ion; B, negative ion.

**Supplementary Figure 1.** MS chromatogram of LJF extract.
